# Index to Volume 57

---

## Articles

|                                                                                                                                                                                                                                                                             |      |
|-----------------------------------------------------------------------------------------------------------------------------------------------------------------------------------------------------------------------------------------------------------------------------|------|
| <b>Agardy, T.</b> Effects of fisheries on marine ecosystems: a conservationist's perspective . . .                                                                                                                                                                          | 761  |
| <b>Anderson, J. T., and Gregory, R. S.</b> Factors regulating survival of northern cod (NAFO 2J3KL) during their first 3 years of life . . . . .                                                                                                                            | 349  |
| <b>Arkhipkin, A., Jereb, P., and Ragonese, S.</b> Growth and maturation in two successive seasonal groups of the short-finned squid, <i>Illex coindetii</i> from the Strait of Sicily (central Mediterranean) . . . . .                                                     | 31   |
| <b>Arnason, R.</b> Economic instruments for achieving ecosystem objectives in fisheries management . . . . .                                                                                                                                                                | 742  |
| <b>Babcock Hollowed, A., Ianelli, J. N., and Livingston, P. A.</b> Including predation mortality in stock assessments: a case study for Gulf of Alaska walleye pollock. . . . .                                                                                             | 279  |
| <b>Bachelet, G., de Montaudouin, X., Auby, I., and Labourg, P.-J.</b> Seasonal changes in macrophyte and macrozoobenthos assemblages in three coastal lagoons under varying degrees of eutrophication . . . . .                                                             | 1495 |
| <b>Balguerías, E., Quintero, M. E., and Hernández-González, C. L.</b> The origin of the Saharan Bank cephalopod fishery . . . . .                                                                                                                                           | 15   |
| <b>Ball, B. J., Fox, G., and Munday, B. W.</b> Long- and short-term consequences of a <i>Nephrops</i> trawl fishery on the benthos and environment of the Irish Sea. . . . .                                                                                                | 1315 |
| <b>Beare, D. J., Gislason, A., Astthorsson, O. S., and McKenzie, E.</b> Assessing long-term changes in early summer zooplankton communities around Iceland . . . . .                                                                                                        | 1545 |
| <b>Bergeron, J.-P.</b> Effect of strong winds on the nutritional condition of anchovy ( <i>Engraulis encrasicolus</i> L.) larvae in the Bay of Biscay, Northeast Atlantic, as inferred from an early field application of the DNA/C index . . . . .                         | 249  |
| <b>Bergman, M. J. N., and van Santbrink, J. W.</b> Mortality in megafaunal benthic populations caused by trawl fisheries on the Dutch continental shelf in the North Sea in 1994                                                                                            | 1321 |
| <b>Bertrand, A., and Josse, E.</b> Acoustic estimation of longline tuna abundance. . . . .                                                                                                                                                                                  | 919  |
| <b>Bez, N., and Rivoirard, J.</b> On the role of sea surface temperature on the spatial distribution of early stages of mackerel using inertigrams . . . . .                                                                                                                | 383  |
| <b>Bianchi, G., Gislason, H., Graham, K., Hill, L., Jin, X., Koranteng, K., Manickchand-Heileman, S., Payá, I., Sainsbury, K., Sanchez, F., and Zwanenburg, K.</b> Impact of fishing on size composition and diversity of demersal fish communities. . . . .                | 558  |
| <b>Blaber, S. J. M., Cyrus, D. P., Albaret, J.-J., Ching, C. V., Day, J. W., Elliott, M., Fonseca, M. S., Hoss, D. E., Orensanz, J., Potter, I. C., and Silvert, W.</b> Effects of fishing on the structure and functioning of estuarine and nearshore ecosystems . . . . . | 590  |
| <b>Booth, A. J.</b> Incorporating the spatial component of fisheries data into stock assessment models . . . . .                                                                                                                                                            | 858  |
| <b>Brodeur, R. D., Wilson, M. T., and Ciannelli, L.</b> Spatial and temporal variability in feeding and condition of age-0 walleye pollock ( <i>Theragra chalcogramma</i> ) in frontal regions of the Bering Sea . . . . .                                                  | 256  |
| <b>Bucklin, A., Astthorsson, O. S., Gislason, A., Allen, L. D., Smolenack, S. B., and Wiebe, P. H.</b> Population genetic variation of <i>Calanus finmarchicus</i> in Icelandic waters: preliminary evidence of genetic differences between Atlantic and Arctic populations | 1592 |
| <b>Caddy, J. F.</b> Marine catchment basin effects versus impacts of fisheries on semi-enclosed seas. . . . .                                                                                                                                                               | 628  |
| <b>Campbell, R. W., and Head, E. J. H.</b> Viability of <i>Calanus finmarchicus</i> eggs <i>in situ</i> : does the presence of intact phytoplankton reduce hatching success? . . . . .                                                                                      | 1780 |
| <b>Cardinale, M., and Arrhenius, F.</b> Decreasing weight-at-age of Atlantic herring ( <i>Clupea harengus</i> ) from the Baltic Sea between 1986 and 1996: a statistical analysis . . . . .                                                                                 | 882  |
| <b>Carscadden, J. E., Frank, K. T., and Leggett, W. C.</b> Evaluation of an environment–recruitment model for capelin ( <i>Mallotus villosus</i> ). . . . .                                                                                                                 | 412  |
| <b>Chu, D., Wiebe, P., and Copley, N.</b> Inference of material properties of zooplankton from acoustic and resistivity measurements . . . . .                                                                                                                              | 1128 |
| <b>Claytor, R. R.</b> Conflict resolution in fisheries management using decision rules: an example using a mixed-stock Atlantic Canadian herring fishery . . . . .                                                                                                          | 1110 |
| <b>Cochrane, N. A., Sameoto, D. D., and Herman, A. W.</b> Scotian Shelf euphausiid and silver hake population changes during 1984–1996 measured by multi-frequency acoustics . .                                                                                            | 122  |
| <b>Collie, J. S., Escanero, G. A., and Valentine, P. C.</b> Photographic evaluation of the impacts of bottom fishing on benthic epifauna . . . . .                                                                                                                          | 987  |

Index to Volume 57

|                                                                                                                                                                                                                                                                   |      |
|-------------------------------------------------------------------------------------------------------------------------------------------------------------------------------------------------------------------------------------------------------------------|------|
| <b>Constable, A. J., de la Mare, W. K., Agnew, D. J., Everson, I., and Miller, D.</b> Managing fisheries to conserve the Antarctic marine ecosystem: practical implementation of the Convention on the Conservation of Antarctic Marine Living Resources (CCAMLR) | 778  |
| <b>Corfield, J.</b> The effects of acid sulphate run-off on a subtidal estuarine macrobenthic community in the Richmond River, NSW, Australia.                                                                                                                    | 1517 |
| <b>Corten, A.</b> A possible adaptation of herring feeding migrations to a change in timing of the <i>Calanus finmarchicus</i> in the eastern North Sea.                                                                                                          | 1261 |
| <b>Crain, J. A., and Miller, C. B.</b> Detection of sex and sex ratio in <i>Calanus finmarchicus</i> early stage fifth copepodites                                                                                                                                | 1773 |
| <b>Cury, P., Bakun, A., Crawford, R. J. M., Jarre, A., Quiñones, R. A., Shannon, L. J., and Verheye, H. M.</b> Small pelagics in upwelling systems: patterns of interaction and structural changes in “wasp-waist” ecosystems                                     | 603  |
| <b>Daan, N., and Fogarty, M. J.</b> Foreword and Symposium overview                                                                                                                                                                                               | 189  |
| <b>Dale, T., and Kaartvedt, S.</b> Diel patterns in stage-specific vertical migration of <i>Calanus finmarchicus</i> in habitats with midnight sun.                                                                                                               | 1800 |
| <b>Dalpadado, P., Ellertsen, B., Melle, W., and Dommasnes, A.</b> Food and feeding conditions of Norwegian spring-spawning herring ( <i>Clupea harengus</i> ) through its feeding migrations                                                                      | 843  |
| <b>Dawe, E. G., Colbourne, E. B., and Drinkwater, K. F.</b> Environmental effects on recruitment of short-finned squid ( <i>Illex illecebrosus</i> )                                                                                                              | 1002 |
| <b>Dekker, W.</b> A Procrustean assessment of the European eel stock                                                                                                                                                                                              | 938  |
| <b>Dekker, W.</b> The fractal geometry of the European eel stock                                                                                                                                                                                                  | 109  |
| <b>de Leiva Moreno, J. I., Agostini, V. N., Caddy, J. F., and Carocci, F.</b> Is the pelagic-demersal ratio from fishery landings a useful proxy for nutrient availability? A preliminary data exploration for the semi-enclosed seas around Europe               | 1091 |
| <b>Desprez, M.</b> Physical and biological impact of marine aggregate extraction along the French coast of the Eastern English Channel: short- and long-term post-dredging restoration                                                                            | 1428 |
| <b>Drinkwater, K., Lochman, S., Taggart, C., Thompson, K., and Frank, K.</b> Entrainment of redfish ( <i>Sebastes</i> spp.) larvae off the Scotian Shelf.                                                                                                         | 372  |
| <b>Durbin, E. G., Garrahan, P. R., and Casas, M. C.</b> Abundance and distribution of <i>Calanus finmarchicus</i> on the Georges Bank during 1995 and 1996                                                                                                        | 1664 |
| <b>Durbin, E. G., Garrahan, P. R., and Casas, M. C.</b> Depth distribution of <i>Calanus finmarchicus</i> nauplii on the Georges Bank during 1995 and 1996.                                                                                                       | 1686 |
| <b>Eleftheriou, A.</b> Marine Benthos Dynamics: Environmental and Fisheries Impacts: Introduction and Overview                                                                                                                                                    | 1299 |
| <b>Escribano, R., and Hidalgo, P.</b> Influence of <i>El Niño</i> and <i>La Niña</i> on the population dynamics of <i>Calanus chilensis</i> in the Humboldt Current ecosystem of northern Chile                                                                   | 1867 |
| <b>Fiksen, Ø.</b> The adaptive timing of diapause – a search for evolutionarily robust strategies in <i>Calanus finmarchicus</i>                                                                                                                                  | 1825 |
| <b>Frank, K. T., Shackell, N. L., and Simon, J. E.</b> An evaluation of the Emerald/Western Bank juvenile haddock closed area.                                                                                                                                    | 1023 |
| <b>Frid, C. L. J., Harwood, K. G., Hall, S. J., and Hall, J. A.</b> Long-term changes in the benthic communities of North Sea fishing grounds                                                                                                                     | 1303 |
| <b>Friedland, K. D., Hansen, L. P., Dunkley, D. A., and MacLean, J. C.</b> Linkage between ocean climate, post-smolt growth, and survival of Atlantic salmon ( <i>Salmo salar</i> L.) in the North Sea area.                                                      | 419  |
| <b>Fromentin, J.-M., Gjøsaeter, J., Bjørnstad, O. N., and Stenseth, N. Chr.</b> Biological processes and environmental factors regulating the dynamics of the Norwegian Skagerrak cod populations since 1919                                                      | 330  |
| <b>Gaard, E.</b> Seasonal abundance and development of <i>Calanus finmarchicus</i> in relation to phytoplankton and hydrography on the Faroe Shelf                                                                                                                | 1605 |
| <b>Gaard, E., and Hansen, B.</b> Variations in the advection of <i>Calanus finmarchicus</i> onto the Faroe Shelf.                                                                                                                                                 | 1612 |
| <b>Garrison, L. P., and Link, J. S.</b> Fishing effects on spatial distribution and trophic guild structure of the fish community in the Georges Bank region                                                                                                      | 723  |
| <b>Gates, J. M.</b> Input substitution in a trap fishery                                                                                                                                                                                                          | 89   |
| <b>Ghertsov, K., Luczak, C., Dewarumez, J.-M., and Dauvin, J.-C.</b> Influence of spatial scales of observation on temporal change in diversity and trophic structure of fine-sand communities from the English Channel and the southern North Sea.               | 1481 |

|                                                                                                                                                                                                                                                                                                                               |      |
|-------------------------------------------------------------------------------------------------------------------------------------------------------------------------------------------------------------------------------------------------------------------------------------------------------------------------------|------|
| <b>Gislason, A., and Astthorsson, O. S.</b> Winter distribution, ontogenetic migration, and rates of egg production of <i>Calanus finmarchicus</i> southwest of Iceland . . . . .                                                                                                                                             | 1727 |
| <b>Gislason, A., Astthorsson, O. S., Petursdottir, H., Gudfinnsson, H., and Bodvarsdottir, A. R.</b> Life cycle of <i>Calanus finmarchicus</i> south of Iceland in relation to hydrography and chlorophyll <i>a</i> . . . . .                                                                                                 | 1619 |
| <b>Gislason, H., and Sinclair, M. M.</b> Introduction (Ecosystem Effects of Fishing) . . . . .                                                                                                                                                                                                                                | 466  |
| <b>Gislason, H., Sinclair, M., Sainsbury, K., and O'Boyle, R.</b> Symposium overview: incorporating ecosystem objectives within fisheries management . . . . .                                                                                                                                                                | 468  |
| <b>Greene, C. H., and Pershing, A. J.</b> The response of <i>Calanus finmarchicus</i> populations to climate variability in the Northwest Atlantic: basin-scale forcing associated with the North Atlantic Oscillation . . . . .                                                                                              | 1536 |
| <b>Groenewold, S., and Fonds, M.</b> Effects on benthic scavengers of discards and damaged benthos produced by the beam-trawl fishery in the southern North Sea . . . . .                                                                                                                                                     | 1395 |
| <b>Hall-Spencer, J. M., and Moore, P. G.</b> Scallop dredging has profound, long-term impacts on maerl habitats . . . . .                                                                                                                                                                                                     | 1407 |
| <b>Harms, I. H., Heath, M. R., Bryant, A. D., Backhaus, J. O., and Hainbucher, D. A.</b> Modelling the Northeast Atlantic circulation: implications for the spring invasion of shelf regions by <i>Calanus finmarchicus</i> . . . . .                                                                                         | 1695 |
| <b>Harris, R. P., Irigoien, X., Head, R. N., Rey, C., Hygum, B. H., Hansen, B. W., Niehoff, B., Meyer-Harms, B., and Carlotti, F.</b> Feeding, growth, and reproduction in the genus <i>Calanus</i> . . . . .                                                                                                                 | 1708 |
| <b>Heath, M. R., Astthorsson, O. S., Dunn, J., Ellertsen, B., Gaard, E., Gislason, A., Gurney, W. S. C., Hind, A. T., Irigoien, X., Melle, W., Niehoff, B., Olsen, K., Skreslet, S., and Tande, K. S.</b> Comparative analysis of <i>Calanus finmarchicus</i> demography at locations around the Northeast Atlantic . . . . . | 1562 |
| <b>Heath, M. R., Fraser, J. G., Gislason, A., Hay, S. J., Jónasdóttir, S. H., and Richardson, K.</b> Winter distribution of <i>Calanus finmarchicus</i> in the Northeast Atlantic . . . . .                                                                                                                                   | 1628 |
| <b>Helle, K.</b> Distribution of the copepodite stages of <i>Calanus finmarchicus</i> from Lofoten to the Barents Sea in July 1989 . . . . .                                                                                                                                                                                  | 1636 |
| <b>Hoffmann, E., and Dolmer, P.</b> Effect of closed areas on distribution of fish and epibenthos. . . . .                                                                                                                                                                                                                    | 1310 |
| <b>Hollingworth, C.</b> Preface (Ecosystem Effects of Fishing) . . . . .                                                                                                                                                                                                                                                      | 465  |
| <b>Hollowed, A. B., Bax, N., Beamish, R., Collie, J., Fogarty, M., Livingston, P., Pope, J., and Rice, J. C.</b> Are multispecies models an improvement on single-species models for measuring fishing impacts on marine ecosystems? . . . . .                                                                                | 707  |
| <b>Holm, M., Holst, J. Chr., and Hansen, L. P.</b> Spatial and temporal distribution of post-smolts of Atlantic salmon ( <i>Salmo salar</i> L.) in the Norwegian Sea and adjacent areas . . . . .                                                                                                                             | 955  |
| <b>Huggett, J. A., and Richardson, A. J.</b> A review of the biology and ecology of <i>Calanus agulhensis</i> off South Africa . . . . .                                                                                                                                                                                      | 1834 |
| <b>Huse, I., and Korneliussen, R.</b> Diel variation in acoustic density measurements of over-wintering herring ( <i>Clupea harengus</i> L.) . . . . .                                                                                                                                                                        | 903  |
| <b>Huse, I., Løkkeborg, S., and Soldal, A. V.</b> Relative selectivity in trawl, longline and gillnet fisheries for cod and haddock . . . . .                                                                                                                                                                                 | 1271 |
| <b>Hygum, B. H., Rey, C., Hansen, B. W., and Carlotti, F.</b> Rearing cohorts of <i>Calanus finmarchicus</i> (Gunnerus) in mesocosms . . . . .                                                                                                                                                                                | 1740 |
| <b>Iles, T. C., and Beverton, R. J. H.</b> The concentration hypothesis: the statistical evidence . . . . .                                                                                                                                                                                                                   | 216  |
| <b>Incze, L. S., Wahle, R. A., and Palma, A. T.</b> Advection and settlement rates in a benthic invertebrate: recruitment to first benthic stage in <i>Homarus americanus</i> . . . . .                                                                                                                                       | 430  |
| <b>Irigoien, X., Obermüller, B., Head, R. N., Harris, R. P., Rey, C., Hansen, B. W., Hygum, B. H., Heath, M. R., and Durbin, E. G.</b> The effect of food on the determination of sex ratio in <i>Calanus</i> spp.: evidence from experimental studies and field data . . . . .                                               | 1752 |
| <b>Jackson, G. D., Alford, R. A., and Choat, J. H.</b> Can length frequency analysis be used to determine squid growth? – An assessment of ELEFAN . . . . .                                                                                                                                                                   | 948  |
| <b>Josse, E., and Bertrand, A.</b> <i>In situ</i> acoustic target strength measurements of tuna associated with a fish aggregating device . . . . .                                                                                                                                                                           | 911  |
| <b>Kaartvedt, S.</b> Life history of <i>Calanus finmarchicus</i> in the Norwegian Sea in relation to planktivorous fish . . . . .                                                                                                                                                                                             | 1819 |
| <b>Karakassis, I., Tsapakis, M., Hatziyanni, E., Papadopoulou, K.-N., and Plaiti, W.</b> Impact of cage farming of fish on the seabed in three Mediterranean coastal areas . . . . .                                                                                                                                          | 1462 |
| <b>Kimura, R., Watanabe, Y., and Zenitani, H.</b> Nutritional condition of first-feeding larvae of Japanese sardine in the coastal and oceanic waters along the Kuroshio Current . . . . .                                                                                                                                    | 240  |

Index to Volume 57

|                                                                                                                                                                                                                                                                                |      |
|--------------------------------------------------------------------------------------------------------------------------------------------------------------------------------------------------------------------------------------------------------------------------------|------|
| <b>Kimura, S., Nakata, H., and Okazaki, Y.</b> Biological production in meso-scale eddies caused by frontal disturbances of the Kuroshio Extension. . . . .                                                                                                                    | 133  |
| <b>Korneliusen, R. J.</b> Measurement and removal of echo integration noise. . . . .                                                                                                                                                                                           | 1204 |
| <b>Koslow, J. A., Boehlert, G. W., Gordon, J. D. M., Haedrich, R. L., Lorange, P., and Parin, N.</b> Continental slope and deep-sea fisheries: implications for a fragile ecosystem . . . .                                                                                    | 548  |
| <b>Köster, F. W., and Möllmann, C.</b> Trophodynamic control by clupeid predators on recruitment success in Baltic cod? . . . . .                                                                                                                                              | 310  |
| <b>Koueta, N., Castro, B. G., and Boucaud-Camou, E.</b> Biochemical indices for instantaneous growth estimation in young cephalopod <i>Sepia officinalis</i> L. . . . .                                                                                                        | 1    |
| <b>Koutsoubas, D. Dounas, C., Arvanitidis, C., Kornilios, S., Petihakis, G., Triantafyllou, G., and Eleftheriou, A.</b> Macrobenthic community structure and disturbance assessment in Gialova Lagoon, Ionian Sea . . . . .                                                    | 1472 |
| <b>Lagardère, F., Thibaudeau, K., and Bégout Anras, M. L.</b> Feasibility of otolith markings in large juvenile turbot, <i>Scophthalmus maximus</i> , using immersion in alizarin-red S solutions. . . . .                                                                     | 1175 |
| <b>Landa, J., and Piñeiro, C.</b> Megrim ( <i>Lepidorhombus whiffiagonis</i> ) growth in the North-eastern Atlantic based on back-calculation of otolith rings . . . . .                                                                                                       | 1077 |
| <b>Lang, G. M., Brodeur, R. D., Napp, J. M., and Schabetsberger, R.</b> Variation in groundfish predation on juvenile walleye pollock relative to hydrographic structure near the Pribilof Islands, Alaska . . . . .                                                           | 265  |
| <b>Law, R.</b> Fishing, selection, and phenotypic evolution . . . . .                                                                                                                                                                                                          | 659  |
| <b>Le Gall, A. C., Hydes, D. J., Kelly-Gerrey, B. A., and Slinn, D. J.</b> Development of a 2D horizontal biogeochemical model for the Irish Sea DYMONIS. . . . .                                                                                                              | 1050 |
| <b>Lindegarth, M., Valentinsson, D., Hansson, M., and Ulmestrand, M.</b> Effects of trawling disturbances on temporal and spatial structure of benthic soft-sediment assemblages in Gullmarsfjorden, Sweden . . . . .                                                          | 1369 |
| <b>Litzow, M. A., Piatt, J. F., Abookire, A. A., Prichard, A. K., and Robards, M. D.</b> Monitoring temporal and spatial variability in sandeel ( <i>Ammodytes hexapterus</i> ) abundance with pigeon guillemot ( <i>Cepphus columba</i> ) diets. . . . .                      | 976  |
| <b>Livingston, P. A., and Jurado-Molina, J. A.</b> Multispecies virtual population analysis of the eastern Bering Sea . . . . .                                                                                                                                                | 294  |
| <b>Livingston, P. A., and Tjelmeland, S.</b> Fisheries in boreal ecosystems . . . . .                                                                                                                                                                                          | 619  |
| <b>Lloret, J., Leonart, J., and Solé, I.</b> Time series modelling of landings in Northwest Mediterranean Sea . . . . .                                                                                                                                                        | 171  |
| <b>Marteinsdottir, G., Gudmundsdottir, A., Thorsteinsson, V., and Stefansson, G.</b> Spatial variation in abundance, size composition and viable egg production of spawning cod ( <i>Gadus morhua</i> L.) in Icelandic waters . . . . .                                        | 824  |
| <b>Marteinsdottir, G., Gunnarsson, B., and Suthers, I. M.</b> Spatial variation in hatch date distributions and origin of pelagic juvenile cod in Icelandic waters . . . . .                                                                                                   | 1182 |
| <b>Mazzola, A., Mirto, S., La Rosa, T., Fabiano, M., and Danovaro, R.</b> Fish-farming effects on benthic community structure in coastal sediments: analysis of meiofaunal recovery . . . . .                                                                                  | 1454 |
| <b>McClelland, G., Misra, R. K., and Martell, D. J.</b> Spatial and temporal distributions of larval sealworm ( <i>Pseudoterranova decipiens</i> , Nematoda: Anisakinae), in <i>Hippoglossoides platessoides</i> (Pleuronectidae) in eastern Canada from 1980 to 1990. . . . . | 69   |
| <b>McConnaughey, R. A., Mier, K. L., and Dew, C. B.</b> An examination of chronic trawling effects on soft-bottom benthos of the eastern Bering Sea. . . . .                                                                                                                   | 1377 |
| <b>McManus, J. W., Meñez, L. A. B., Kesner-Reyes, K. N., Vergara, S. G., and Ablan, M. C.</b> Coral reef fishing and coral-algal phase shifts: implications for global reef status . . . .                                                                                     | 572  |
| <b>Ménard, F., Fonteneau, A., Gaertner, D., Nordstrom, V., Stéquert, B., and Marchal, E.</b> Exploitation of small tunas by a purse-seine fishery with fish aggregating devices and their feeding ecology in an eastern tropical Atlantic ecosystem . . . . .                  | 525  |
| <b>Miller, C. B., Crain, J. A., and Morgan, C. A.</b> Oil storage variability in <i>Calanus finmarchicus</i> . . . . .                                                                                                                                                         | 1786 |
| <b>Moll, A.</b> Assessment of three-dimensional physical-biological ECOHAM1 simulations by quantified validation for the North Sea with ICES and ERSEM data. . . . .                                                                                                           | 1060 |
| <b>Moran, M. J., and Stephenson, P. C.</b> Effects of otter trawling on macrobenthos and management of demersal scalefish fisheries on the continental shelf of north-western Australia . . . . .                                                                              | 510  |
| <b>Munch, S. B., and Conover, D. O.</b> Recruitment dynamics of bluefish ( <i>Pomatomus saltatrix</i> ) from Cape Hatteras to Cape Cod, 1973–1995. . . . .                                                                                                                     | 393  |
| <b>Murawski, S. A.</b> Definitions of overfishing from an ecosystem perspective . . . . .                                                                                                                                                                                      | 649  |

|                                                                                                                                                                                                                              |      |
|------------------------------------------------------------------------------------------------------------------------------------------------------------------------------------------------------------------------------|------|
| <b>Murta, A. G.</b> Morphological variation of horse mackerel ( <i>Trachurus trachurus</i> ) in the Iberian and North African Atlantic: implications for stock identification . . . . .                                      | 1240 |
| <b>Nakata, H., Kimura, S., Okazaki, Y., and Kasai, A.</b> Implications of meso-scale eddies caused by frontal disturbances of the Kuroshio Current for anchovy recruitment. . . . .                                          | 143  |
| <b>Neuenfeldt, S., and Köster, F. W.</b> Trophodynamic control on recruitment success in Baltic cod: the influence of cannibalism . . . . .                                                                                  | 300  |
| <b>Niehoff, B.</b> Effect of starvation on the reproductive potential of <i>Calanus finmarchicus</i> . . . . .                                                                                                               | 1764 |
| <b>Orlowski, A.</b> Diel dynamics of acoustic measurements of Baltic fish . . . . .                                                                                                                                          | 1196 |
| <b>Ottersen, G., and Loeng, H.</b> Covariability in early growth and year-class strength of Barents Sea cod, haddock, and herring: the environmental link. . . . .                                                           | 339  |
| <b>Overholtz, W. J., Link, J. S., and Suslowicz, L. E.</b> Consumption of important pelagic fish and squid by predatory fish in the northeastern USA shelf ecosystem with some fishery comparisons . . . . .                 | 1147 |
| <b>Pastors, M. A., Rijnsdorp, A. D., and Van Beek, F. A.</b> Effects of a partially closed area in the North Sea ("plaice box") on stock development of plaice . . . . .                                                     | 1014 |
| <b>Pauly, D., Christensen, V., and Walters, C.</b> Ecopath, Ecosim, and Ecospace as tools for evaluating ecosystem impact of fisheries. . . . .                                                                              | 697  |
| <b>Pavlov, D. A., Moksness, E., and Burmowski, V. A.</b> Otolith microstructure characteristics in White Sea spring-spawning herring ( <i>Clupea pallasii marisalbi</i> Berg) larvae . . . . .                               | 1069 |
| <b>Pedersen, O.-P., Tande, K. S., Timonin, A., and Semenova, T.</b> A possible connection between hydrography and the distribution of <i>Calanus finmarchicus</i> on the Norwegian midshelf in 1997. . . . .                 | 1645 |
| <b>Piet, G. J., Rijnsdorp, A. D., Bergman, M. J. N., van Santbrink, J. W., Craeymeersch, J., and Buijs, J.</b> A quantitative evaluation of the impact of beam trawling on benthic fauna in the southern North Sea . . . . . | 1332 |
| <b>Pitcher, C. R., Poiner, I. R., Hill, B. J., and Burridge, C. Y.</b> Implications of the effects of trawling on sessile megazoobenthos on a tropical shelf in northeastern Australia . . . . .                             | 1359 |
| <b>Planque, B., and Batten, S. D.</b> <i>Calanus finmarchicus</i> in the North Atlantic: the year of <i>Calanus</i> in the context of interdecadal change . . . . .                                                          | 1528 |
| <b>Pope, J. G., MacDonald, D. S., Daan, N., Reynolds, J. D., and Jennings, S.</b> Gauging the impact of fishing mortality on non-target species. . . . .                                                                     | 689  |
| <b>Powles, H., Bradford, M. J., Bradford, R. G., Doubleday, W. G., Innes, S., and Levings, C. D.</b> Assessing and protecting endangered marine species . . . . .                                                            | 669  |
| <b>Pranovi, F., Raicevich, S., Franceschini, G., Farrace, M. G., and Giovanardi, O.</b> Rapido trawling in the northern Adriatic Sea: effects on benthic communities in an experimental area. . . . .                        | 517  |
| <b>Reid, P. C., Battle, E. J. V., Batten, S. D., and Brander, K. M.</b> Impacts of fisheries on plankton community structure . . . . .                                                                                       | 495  |
| <b>Relini, G., Relini, M., and Torchia, G.</b> The role of fishing gear in the spreading of allochthonous species: the case of <i>Caulerpa taxifolia</i> in the Ligurian Sea . . . . .                                       | 1421 |
| <b>Rice, J. C.</b> Evaluating fishery impacts using metrics of community structure . . . . .                                                                                                                                 | 682  |
| <b>Richardson, K.</b> Integrating environment and fisheries management objectives in the ICES Area: reflections of a past ACME chair. . . . .                                                                                | 766  |
| <b>Rijnsdorp, A. D., Dol, W., Hoyer, M., and Pastors, M. A.</b> Effects of fishing power and competitive interactions among vessels on the effort allocation on the trip level of the Dutch beam trawl fleet. . . . .        | 927  |
| <b>Rijnsdorp, A. D., van Mourik Broekman, P. L., and Visser, E. G.</b> Competitive interactions among beam trawlers exploiting local patches of flatfish in the North Sea . . . . .                                          | 894  |
| <b>Rochet, M.-J.</b> A comparative approach to life-history strategies and tactics among four orders of teleost fish . . . . .                                                                                               | 228  |
| <b>Rochet, M.-J.</b> Does the concept of spawning per recruit make sense? . . . . .                                                                                                                                          | 1160 |
| <b>Rogers, S. I., and Ellis, J. R.</b> Changes in the demersal fish assemblages of British coastal waters during the 20th century. . . . .                                                                                   | 866  |
| <b>Rothschild, B. J.</b> "Fish stocks and recruitment": the past thirty years. . . . .                                                                                                                                       | 191  |
| <b>Rumohr, H., and Kujawski, T.</b> The impact of trawl fishery on the epifauna of the southern North Sea. . . . .                                                                                                           | 1389 |
| <b>Sabatini, M. E., Ramirez, F. C., and Martos, P.</b> Distribution pattern and population structure of <i>Calanus australis</i> Brodsky, 1959 over the southern Patagonian Shelf off Argentina in summer . . . . .          | 1856 |
| <b>Saborido-Rey, F., and Nedreaas, K. H.</b> Geographic variation of <i>Sebastes mentella</i> in the Northeast Arctic derived from a morphometric approach . . . . .                                                         | 965  |

|                                                                                                                                                                                                                                                                                           |      |
|-------------------------------------------------------------------------------------------------------------------------------------------------------------------------------------------------------------------------------------------------------------------------------------------|------|
| <b>Sainsbury, K. J., Punt, A. E., and Smith, A. D. M.</b> Design of operational management strategies for achieving fishery ecosystem objectives. . . . .                                                                                                                                 | 731  |
| <b>Sakurai, Y., Kiyofuji, H., Saitoh, S., Goto, T., and Hiyama, Y.</b> Changes in inferred spawning areas of <i>Todarodes pacificus</i> (Cephalopoda: Ommastrephidae) due to changing environmental conditions. . . . .                                                                   | 24   |
| <b>Sánchez, F., and Gil, J.</b> Hydrographic mesoscale structures and Poleward Current as a determinant of hake ( <i>Merluccius merluccius</i> ) recruitment in southern Bay of Biscay. . . . .                                                                                           | 152  |
| <b>Sanchez, P., Demestre, M., Ramon, M., and Kaiser, M. J.</b> The impact of otter trawling on mud communities in the northwestern Mediterranean. . . . .                                                                                                                                 | 1352 |
| <b>Sardá, R., Pinedo, S., Gremare, A., and Taboada, S.</b> Changes in the dynamics of shallow sandy-bottom assemblages due to sand extraction in the Catalan Western Mediterranean Sea. . . . .                                                                                           | 1446 |
| <b>Schabetsberger, R., Brodeur, R. D., Ciannelli, L., Napp, J. M., and Swartzman, G. L.</b> Diel vertical migration and interaction of zooplankton and juvenile walleye pollock ( <i>Theragra chalcogramma</i> ) at a frontal region near the Pribilof Islands, Bering Sea. . . . .       | 1283 |
| <b>Schultz, E. T., Cowen, R. K., Lwiza, K. M. M., and Gospodarek, A. M.</b> Explaining advection: do larval bay anchovy ( <i>Anchoa mitchilli</i> ) show selective tidal-stream transport? . . . . .                                                                                      | 360  |
| <b>Secor, D. H.</b> Spawning in the nick of time? Effect of adult demographics on spawning behaviour and recruitment in Chesapeake Bay striped bass. . . . .                                                                                                                              | 403  |
| <b>Secor, D. H.</b> Longevity and resilience of Chesapeake Bay striped bass. . . . .                                                                                                                                                                                                      | 808  |
| <b>Shannon, L. J., Cury, P. M., and Jarre, A.</b> Modelling effects of fishing in the Southern Benguela ecosystem. . . . .                                                                                                                                                                | 720  |
| <b>Shiganova, T. A., and Bulgakova, Y. V.</b> Effects of gelatinous plankton on Black Sea and Sea of Azov fish and their food resources. . . . .                                                                                                                                          | 641  |
| <b>Soiland, H., and Skogen, M. D.</b> Validation of a three-dimensional biophysical model using nutrient observations in the North Sea. . . . .                                                                                                                                           | 816  |
| <b>Skjærraasen, J. E., and Bergstad, O. A.</b> Distribution and feeding ecology of <i>Raja radiata</i> in the northeastern North Sea and Skagerrak (Norwegian Deep). . . . .                                                                                                              | 1249 |
| <b>Skreslet, S., Olsen, K., Mohus, Å., and Tande, K. S.</b> Stage-specific habitats of <i>Calanus finmarchicus</i> and <i>Calanus helgolandicus</i> in a stratified northern Norwegian fjord. . . . .                                                                                     | 1656 |
| <b>Smith, C. J., Papadopoulou, K. N., and Diliberto, S.</b> Impact of otter trawling on an eastern Mediterranean commercial trawl fishing ground. . . . .                                                                                                                                 | 1340 |
| <b>Stanley, R. D., Kieser, R., Cooke, K., Surry, A. M., and Mose, B.</b> Estimation of a widow rockfish ( <i>Sebastes entomelas</i> ) shoal off British Columbia, Canada as a joint exercise between stock assessment staff and the fishing industry. . . . .                             | 1035 |
| <b>Stanton, T. K., and Chu, D.</b> Review and recommendations for the modelling of acoustic scattering by fluid-like elongated zooplankton: euphausiids and copepods. . . . .                                                                                                             | 793  |
| <b>Stevens, J. D., Bonfil, R., Dulvy, N. K., and Walker, P. A.</b> The effects of fishing on sharks, rays, and chimaeras (chondrichthyans), and the implications for marine ecosystems. . . . .                                                                                           | 476  |
| <b>Sumaila, U. R., Guénette, S., Alder, J., and Chuenpagdee, R.</b> Addressing ecosystem effects of fishing using marine protected areas. . . . .                                                                                                                                         | 752  |
| <b>Swain, D. P., Poirier, G. A., and Sinclair, A. F.</b> Effect of water temperature on catchability of Atlantic cod ( <i>Gadus morhua</i> ) to the bottom-trawl survey in the southern Gulf of St Lawrence. . . . .                                                                      | 56   |
| <b>Syrjala, S. E.</b> Critique on the use of the delta distribution for the analysis of trawl survey data. . . . .                                                                                                                                                                        | 831  |
| <b>Tande, K. S., Drobysheva, S., Nesterova, V., Nilssen, E. M., Edvardsen, A., and Tereschenko, V.</b> Patterns in the variations of copepod spring and summer abundance in the northeastern Norwegian Sea and the Barents Sea in cold and warm years during the 1980s and 1990s. . . . . | 1581 |
| <b>Tande, K. S., and Miller, C. B.</b> Introduction (Population Dynamics of <i>Calanus</i> in the North Atlantic). . . . .                                                                                                                                                                | 1527 |
| <b>Tasker, M. L., Camphuysen, C. J. (Kees), Cooper, J., Garthe, S., Montevecchi, W. A., and Blaber, S. J. M.</b> The impacts of fishing on marine birds. . . . .                                                                                                                          | 531  |
| <b>Tegner, M. J., and Dayton, P. K.</b> Ecosystem effects of fishing in kelp forest communities. . . . .                                                                                                                                                                                  | 579  |
| <b>Triantafyllou, G., Petihakis, G., Dounas, C., Koutsoubas, D., Arvanitidis, C., and Eleftheriou, A.</b> Temporal variations in benthic communities and their response to physicochemical forcing: a numerical approach. . . . .                                                         | 1507 |

Index to Volume 57

|                                                                                                                                                                                                                                                           |      |
|-----------------------------------------------------------------------------------------------------------------------------------------------------------------------------------------------------------------------------------------------------------|------|
| <b>Tuck, I. D., Atkinson, R. J. A., and Chapman, C. J.</b> Population biology of the Norway lobster, <i>Nephrops norvegicus</i> (L.) in the Firth of Clyde, Scotland II: fecundity and size at onset of sexual maturity. . . . .                          | 1227 |
| <b>Tuya, F. C., Soboil, M. L., and Kido, J.</b> An assessment of the effectiveness of Marine Protected Areas in the San Juan Islands, Washington, USA . . . . .                                                                                           | 1218 |
| <b>Uye, S.</b> Why does <i>Calanus sinicus</i> prosper in the shelf ecosystem of the Northwest Pacific Ocean? . . . . .                                                                                                                                   | 1850 |
| <b>Uzars, D., and Plikshs, M.</b> Cod ( <i>Gadus morhua</i> L.) cannibalism in the Central Baltic: interannual variability and influence of recruit abundance and distribution. . . . .                                                                   | 324  |
| <b>van Dalfsen, J. A., Essink, K., Toxvig Madsen, H., Birklund, J., Romero, J., and Manzanera, M.</b> Differential response of macrozoobenthos to marine sand extraction in the North Sea and the Western Mediterranean . . . . .                         | 1439 |
| <b>van der Meer, J., Beukema, J. J., and Dekker, R.</b> Population dynamics of two marine polychaetes: the relative role of density dependence, predation, and winter conditions . . . . .                                                                | 1488 |
| <b>van der Veer, H. W., Berghahn, R., Miller, J. M., and Rijnsdorp, A. D.</b> Recruitment in flatfish, with special emphasis on North Atlantic species: progress made by the Flatfish Symposia . . . . .                                                  | 202  |
| <b>Vecchione, M., Mickevich, M. F., Fauchald, K., Collette, B. B., Williams, A. B., Munroe, T. A., and Young, R. E.</b> Importance of assessing taxonomic adequacy in determining fishing effects on marine biodiversity . . . . .                        | 677  |
| <b>Vorberg, R.</b> Effects of shrimp fisheries on reefs of <i>Sabellaria spinulosa</i> (Polychaeta) . . . . .                                                                                                                                             | 1416 |
| <b>Wespestad, V. G., Fritz, L. W., Ingraham, W. J., and Megrey, B. A.</b> On relationships between cannibalism, climate variability, physical transport, and recruitment success of Bering Sea walleye pollock ( <i>Theragra chalcogramma</i> ) . . . . . | 272  |
| <b>Wieland, K., Jarre-Teichmann, A., and Horbowa, K.</b> Changes in the timing of spawning of Baltic cod: possible causes and implications for recruitment . . . . .                                                                                      | 452  |
| <b>Witherell, D., Pautzke, C., and Fluharty, D.</b> An ecosystem-based approach for Alaska groundfish fisheries. . . . .                                                                                                                                  | 771  |
| <b>Yaragina, N. A., and Marshall, C. T.</b> Trophic influences on interannual and seasonal variation in the liver condition index of Northeast Arctic cod ( <i>Gadus morhua</i> ) . . . . .                                                               | 42   |
| <b>Ye, Y.</b> Is recruitment related to spawning stock in penaeid shrimp fisheries? . . . . .                                                                                                                                                             | 1103 |
| <b>Zheng, J., and Kruse, G. H.</b> Recruitment patterns of Alaskan crabs in relation to decadal shifts in climate and physical oceanography. . . . .                                                                                                      | 438  |
| <b>Zwanenburg, K. C. T.</b> The effects of fishing on demersal fish communities of the Scotian Shelf. . . . .                                                                                                                                             | 503  |
| <br><b>Short communication</b>                                                                                                                                                                                                                            |      |
| <b>Bertrand, A., and Josse, E.</b> Tuna target-strength related to fish length and swimbladder volume . . . . .                                                                                                                                           | 1143 |
| <b>Letter to the Editors.</b> . . . . .                                                                                                                                                                                                                   | 185  |
| <b>Obituary.</b> . . . . .                                                                                                                                                                                                                                | 1296 |
| <b>Erratum .</b> . . . .                                                                                                                                                                                                                                  | 1525 |
| <b>Erratum .</b> . . . .                                                                                                                                                                                                                                  | 1526 |
| <b>List of referees .</b> . . . .                                                                                                                                                                                                                         | 792  |
| <b>List of referees .</b> . . . .                                                                                                                                                                                                                         | 1524 |
| <b>List of referees .</b> . . . .                                                                                                                                                                                                                         | 1875 |
